# Supplementary figures and images for: Proton-Pump Inhibitors Versus H2-Receptor Antagonists on the Risk of Major Osteoporotic Fractures: A Global Propensity-Score-Matched Cohort Study
Source: Research Square preprint supplement (doi:10.21203/rs.3.rs-7725160/v1), 2025-11-10

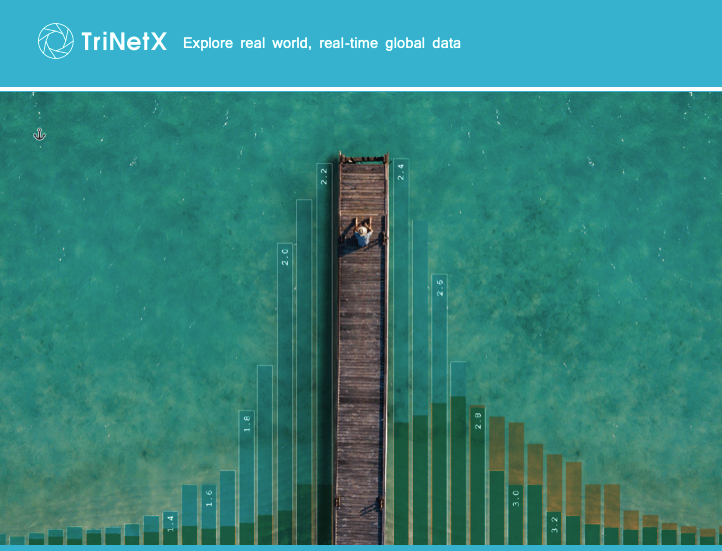


GI

Compare Outcomes Analysis

Created by TriNetX on Jul 6, 2025, 02:32:09 UTC

Supplement: Supplementary file 1 [file 0c93976ee25cb7632ebef836.docx]
